# Supplementary material for: When parents face the death of their child: a nationwide cross-sectional survey of parental perspectives on their child’s end-of life care
Source: Springer Nature journal article supplement (doi:10.1186/s12904-016-0098-3), 2016-03-08
Supplement: MOESM1 [file 9754640]

## List of all Human Research Ethics Committees that approved the PELICAN study

| Swiss canton | Committee's full name                                                                       | Study reference number  | Date of approval |
|--------------|---------------------------------------------------------------------------------------------|-------------------------|------------------|
| Zurich       | <b>Leitethikkommission:</b><br>Kantonale Ethik-Kommission Zürich (KEK)                      | KEK-ZH-Nr.<br>2012-0537 | 11. 03. 2013     |
| Aargau       | Kantonale Ethikkommission Aargau                                                            | 2013/030                | 21.05.2013       |
| Basel        | Ethikkommission beider Basel                                                                | 101/13                  | 23.05.2013       |
| Bern         | Kantonale Ethikkommission Bern (KEK)                                                        | KEK-BE:<br>058/13       | 07.05.2013       |
| Genève       | Commission d'éthique de la recherche sur l'être humain (CEREH)                              | CER: 13-150             | 23.07.2013       |
| Luzern       | Kanton Luzern, Gesundheits- und Sozialdepartement, Dienststelle Gesundheit, Ethikkommission | Keine                   | 02.05.2013       |
| St. Gallen   | Kanton St. Gallen, Ethikkommission                                                          | EKSG 13/042             | 06.05.2013       |
| Ticino       | Comitato etico cantonale                                                                    | CEL 2704                | 01.07.2013       |
| Thurgau      | Kantonale Ethikkommission Thurgau                                                           | 2013/21                 | 08.08.2013       |
| Vaud         | Commission cantonale d'éthique de la recherche sur l'être humain                            | NE230/13                | 30.08.2013       |
| Valais       | Commission cantonale valaisanne d'éthique médicale                                          | CCVEM<br>024/13         | 17.06.2013       |
